# Supplementary material
Source: ML conference proceedings conference paper supplement (https://www.ecva.net/papers/eccv_2020/papers_ECCV/html/123590630_ECCV_2020_paper.php)
Supplement: Supplementary file 1 [file 123590630-supp.pdf]

# Supplemental Material

## Classes Matter: A Fine-grained Adversarial Approach to Cross-domain Semantic Segmentation

Anonymous ECCV submission

Paper ID 2246

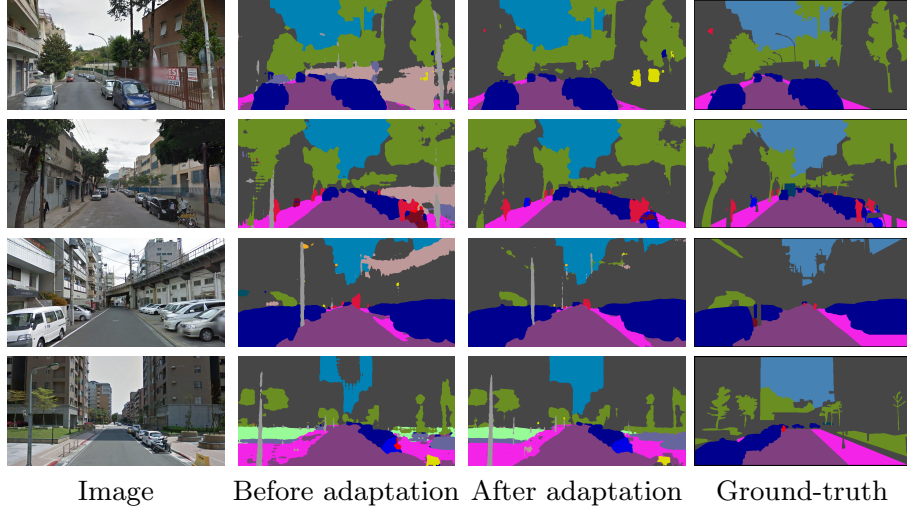

Fig. 1: Qualitative segmentation results for Cityscapes  $\rightarrow$  Cross-City.

### 1 Qualitative Comparison

We present more qualitative results on Cityscapes  $\rightarrow$  Cross-City (Figure 1), GTA5  $\rightarrow$  Cityscapes (Figure 2) and SYNTHIA  $\rightarrow$  Cityscapes (Figure 3) tasks. For SYNTHIA  $\rightarrow$  Cityscapes and GTA5  $\rightarrow$  Cityscapes (Figure 2) task, we also present a qualitative comparison between FADA and previous global feature alignment based method. We could observe FADA generally yields qualitatively better results compared to traditional global feature alignment methods.

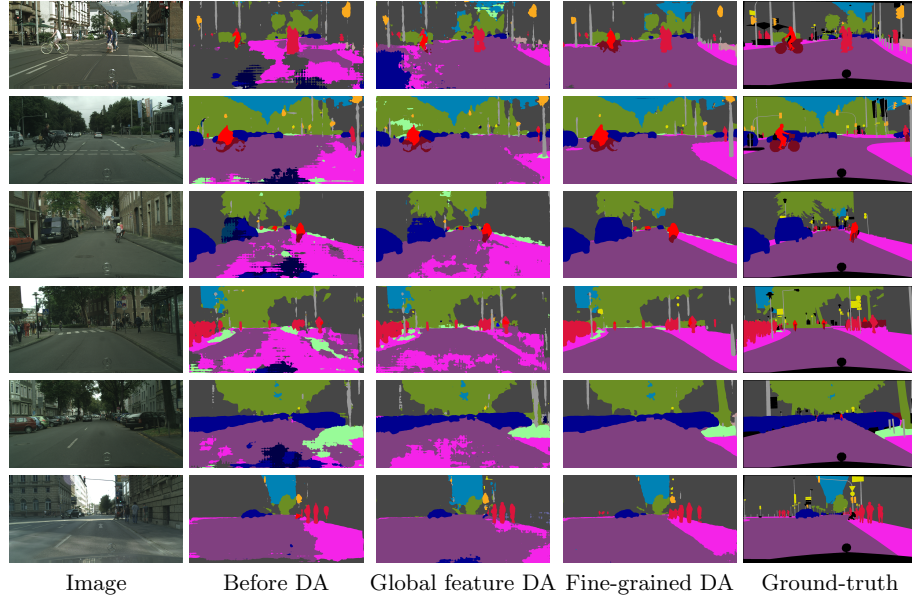

Fig. 2: Qualitative segmentation results for  $\text{GTA5} \rightarrow \text{Cityscapes}$ . DA is the abbreviation of domain adaptation. FADA yields qualitatively better predictions.

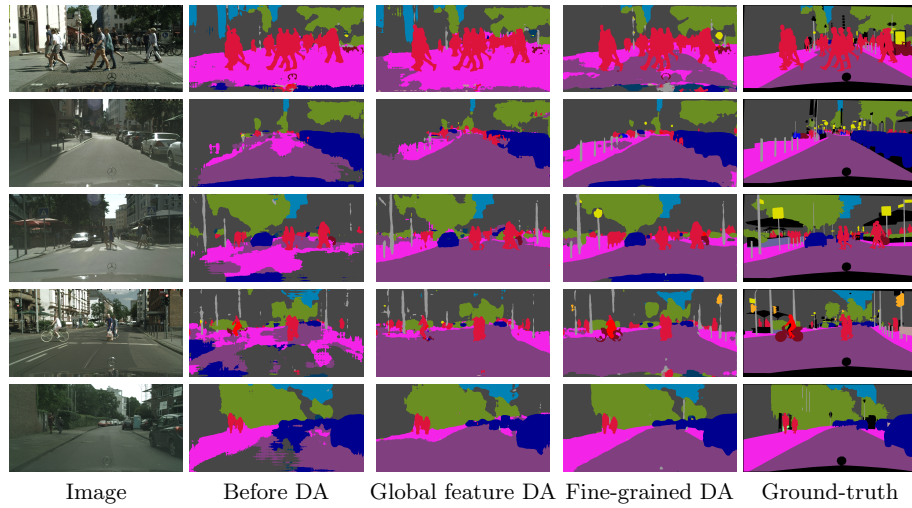

Fig. 3: Qualitative segmentation results for  $\text{SYNTHIA} \rightarrow \text{Cityscapes}$ . DA is the abbreviation of domain adaptation. FADA yields qualitatively better predictions.
